# Supplementary material for: Temporal trends and regional disparity in rheumatoid arthritis and gout hospitalizations in Sweden, 1998–2015
Source: Springer Nature journal article supplement (doi:10.1007/s10067-018-3983-8), 2018-01-22

**Table S1. The absolute and relative disparities for rheumatoid arthritis (RA) and gout hospitalizations in Sweden, 1998-2015.**

|      | 1998                                                                    | 1999 | 2000 | 2001 | 2002 | 2003 | 2004 | 2005 | 2006 | 2007 | 2008 | 2009 | 2010 | 2011 | 2012 | 2013 | 2014 | 2015 | Z score     | P for trend |
|------|-------------------------------------------------------------------------|------|------|------|------|------|------|------|------|------|------|------|------|------|------|------|------|------|-------------|-------------|
|      | Absolute weighted mean difference from overall mean per 100,000 persons |      |      |      |      |      |      |      |      |      |      |      |      |      |      |      |      |      |             |             |
| RA   | 25.8                                                                    | 28.4 | 25.5 | 26.8 | 19.9 | 13.4 | 17.6 | 19.4 | 20.8 | 23.6 | 20.3 | 11.6 | 12.3 | 10.1 | 7.2  | 4.4  | 3.9  | 4.7  | <b>-4.1</b> | <0.001      |
| Gout | 1.4                                                                     | 1.8  | 2.9  | 3.2  | 2.2  | 2.3  | 3.4  | 1.9  | 2.3  | 2.7  | 3.1  | 3.5  | 2.6  | 3.7  | 4.0  | 5.0  | 6.3  | 6.5  | <b>+3.9</b> | <0.001      |
|      | Index of disparity (%)                                                  |      |      |      |      |      |      |      |      |      |      |      |      |      |      |      |      |      |             |             |
| RA   | 25.3                                                                    | 28.6 | 25.1 | 28.1 | 28.8 | 21.9 | 27.5 | 34.9 | 33.3 | 35.7 | 34.9 | 26.4 | 30.2 | 27.1 | 22.1 | 19.8 | 18.5 | 27.5 | -0.8        | 0.41        |
| Gout | 16.6                                                                    | 22.4 | 31.9 | 35.5 | 41.2 | 29.2 | 34.4 | 17.2 | 26.8 | 27.6 | 23.2 | 23.9 | 18.8 | 21.9 | 22.1 | 26.9 | 25.3 | 28.8 | -0.5        | 0.60        |

\*Statistically significant results (p<0.05) are in bold.

**Figure S1. Proportions of rheumatoid arthritis and gout hospitalizations from (a) musculoskeletal disorders hospitalizations, and (b) all hospitalizations by age groups, 1998-2015.**

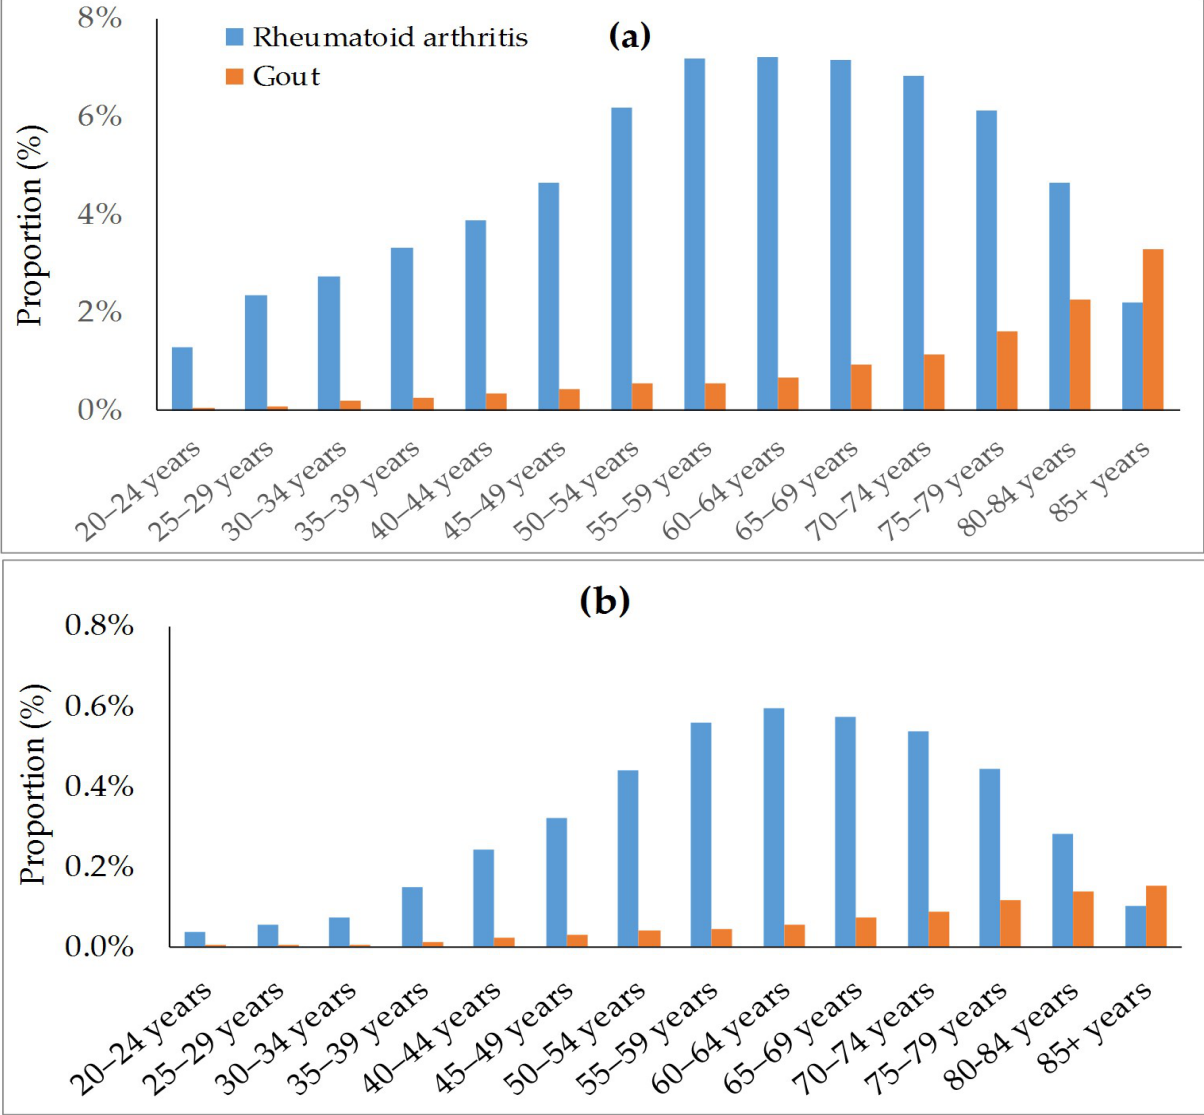

**Figure S2. Annual age-standardized hospitalization rates per 100,000 Swedish adults for rheumatoid arthritis and gout by sex, 1998-2015.** Symbols display the observed values and solid lines indicate fitted values using joinpoint regression. For each joinpoint, the annual percentage change (APC) and its 95% confidence interval are reported.

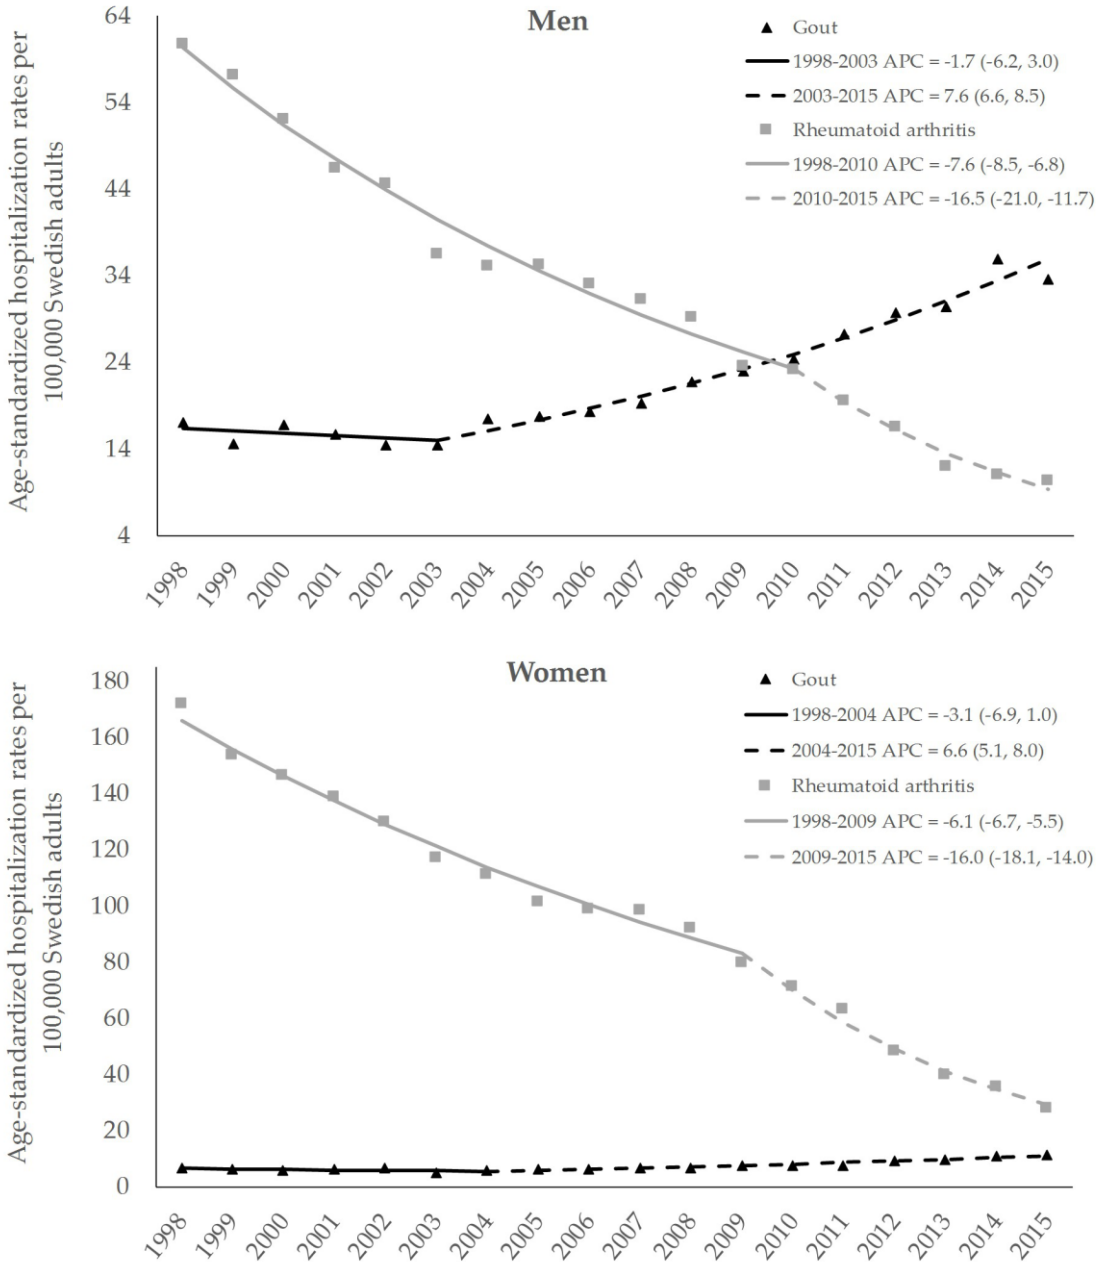

**Figure S3. Annual hospitalization rates per 100,000 persons for rheumatoid arthritis and gout by age groups, 1998-2015.** Symbols display the observed values and solid lines indicate fitted values using joinpoint regression. For each joinpoint, the annual percentage change (APC) and its 95% confidence interval are reported.

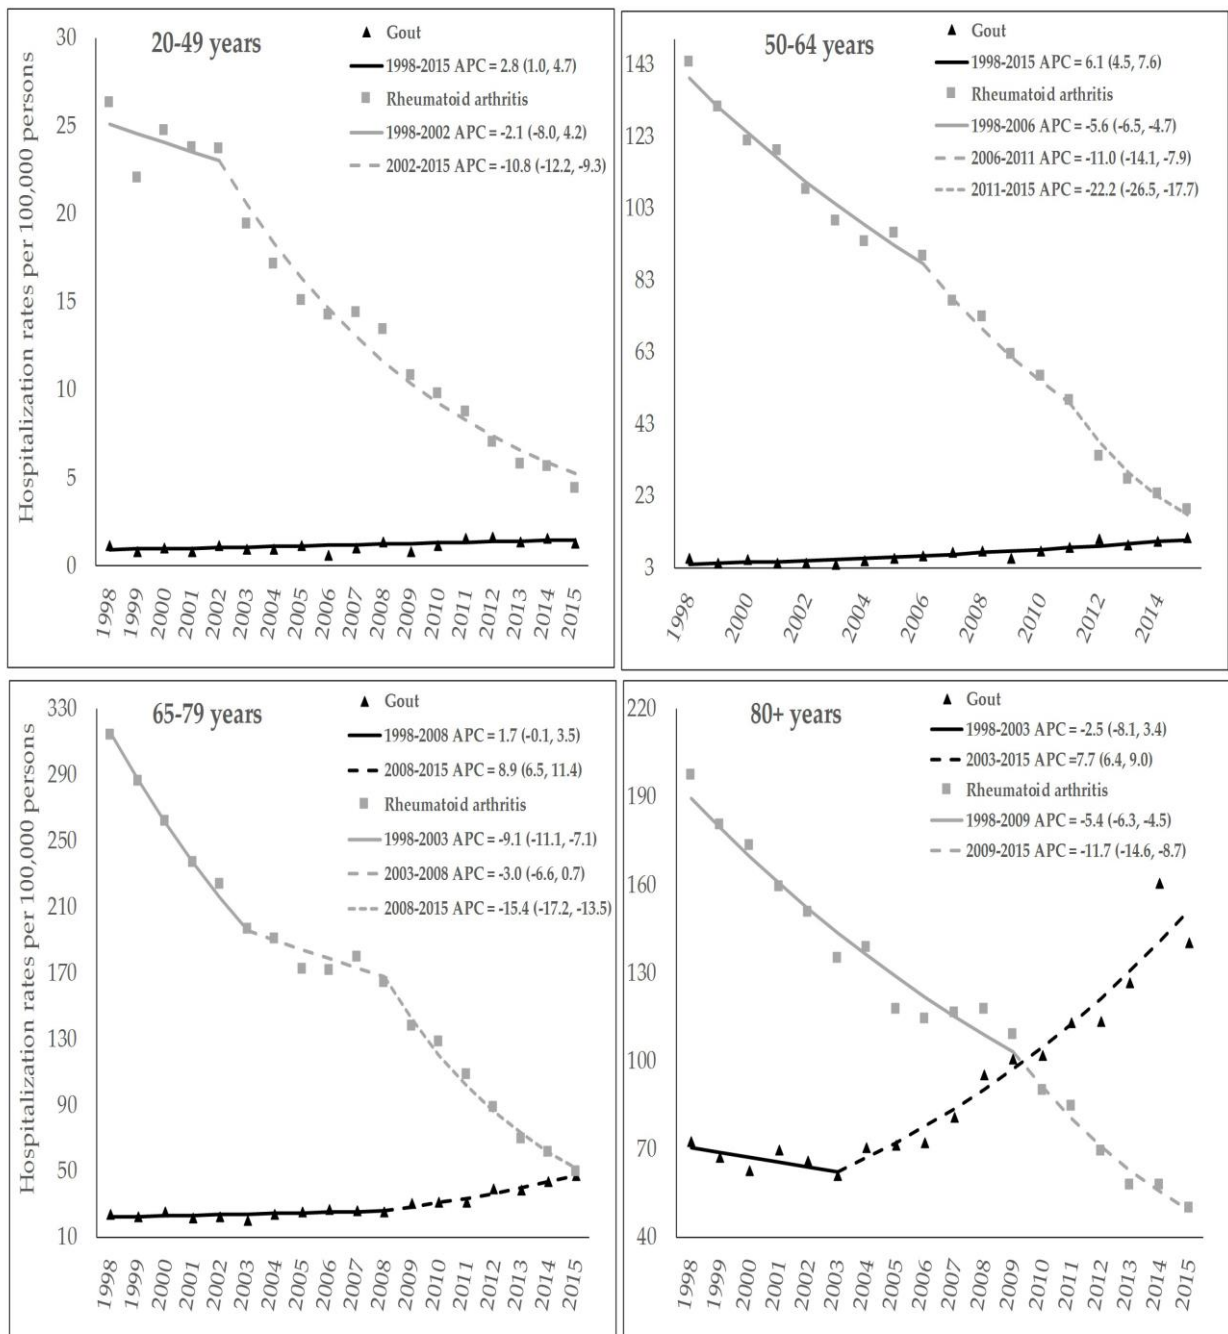

Supplement: MOESM1 [file 15406116]
